# Supplementary material for: Anchoring Ce-modified Ni(OH)2nanoparticles on Ni-MOF nanosheets to enhances the oxygen evolution performance
Source: Royal Society of Chemistry journal article supplement (doi:10.1039/d2dt02182j), 2022-01-01
Supplement: d2dt02182j1.pdf [file d2dt02182j1.pdf]

## Supporting Information

### **Anchoring Ce-Modified Ni(OH)<sub>2</sub> Nanoparticles on Ni-MOF Nanosheets Enhance the Oxygen Evolution Performance**

Dongying Liu<sup>a,c</sup>, Zhifeng Zhao<sup>c</sup>, Zhikun Xu<sup>a,b,\*</sup>, Lin Li<sup>a,\*</sup>, Shuangyan Lin<sup>a,c,\*</sup>

<sup>a</sup> *Key Laboratory for Photonic and Electronic Bandgap Materials, Ministry of Education, School of Physics and Electronic Engineering, Harbin Normal University, Harbin 150025, PR China*

<sup>b</sup> *School of Science, Guangdong University of Petrochemical Technology, Maoming, Guangdong 525000, PR China*

<sup>c</sup> *School of Chemistry, Guangdong University of Petrochemical Technology, Maoming, Guangdong 525000, PR China*

\*Corresponding author.

E-mail address: [xuzhikunnano@163.com](mailto:xuzhikunnano@163.com) (Xu Z.); [linshyan123@163.com](mailto:linshyan123@163.com) (Lin S.)

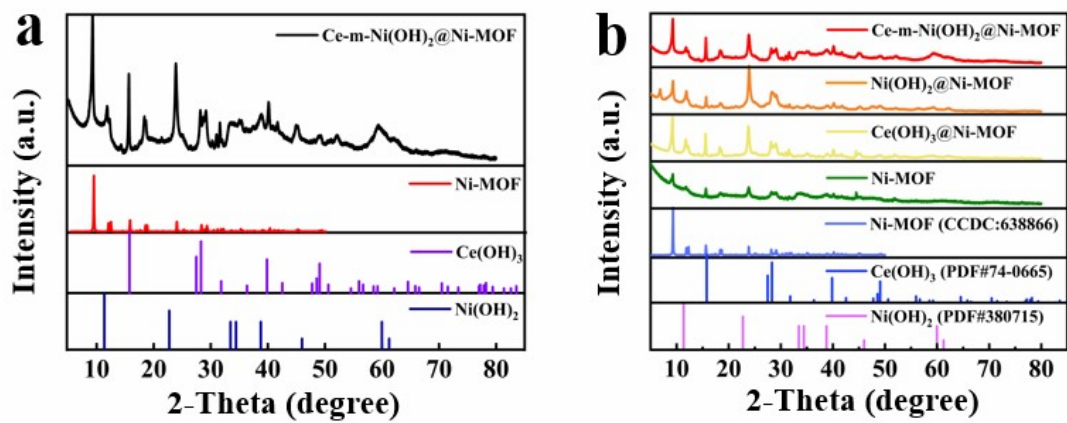

**Figure S1.** XRD patterns of a) Ce-m-Ni(OH)<sub>2</sub>@Ni-MOF, b) Ni(OH)<sub>2</sub>@Ni-MOF, Ce(OH)<sub>3</sub>@Ni-MOF and Ni-MOF.

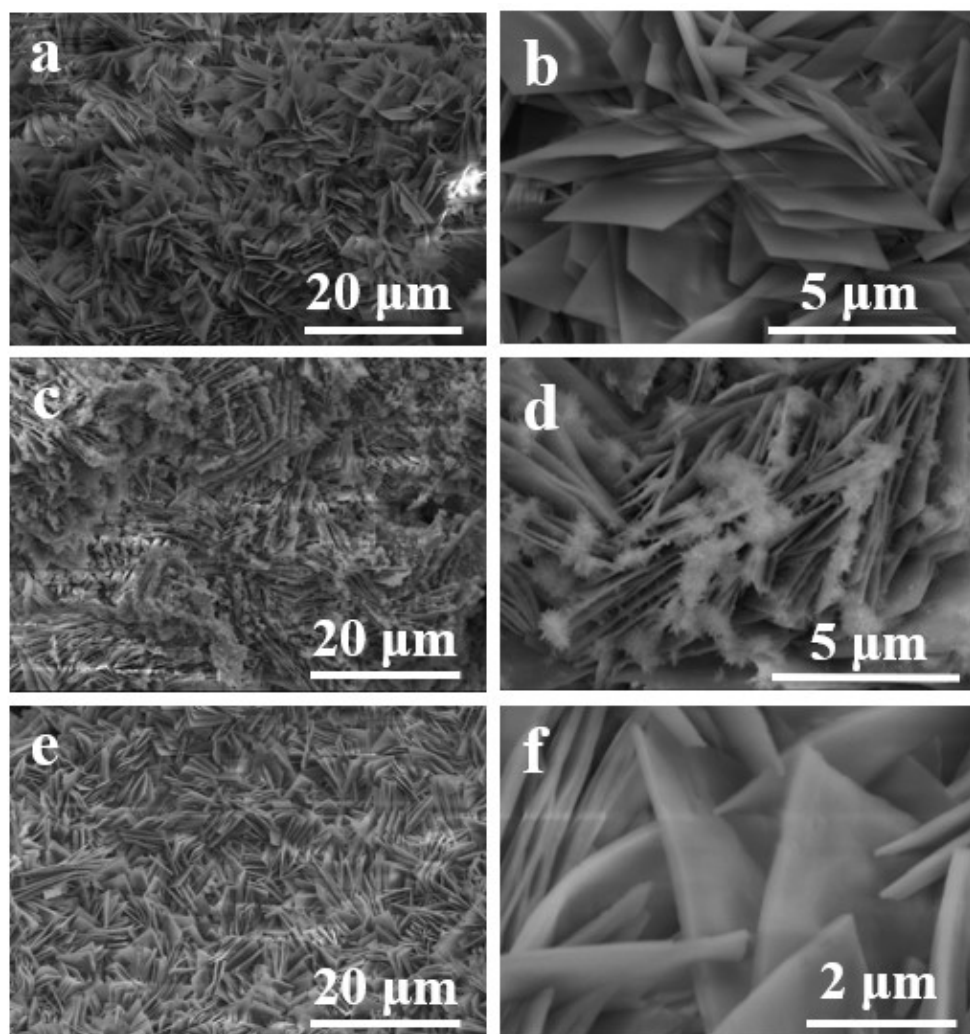

**Figure S2.** SEM images of a-b) Ni-MOF, c-d) Ce(OH)<sub>3</sub>@Ni-MOF, e-f) Ni(OH)<sub>2</sub>@Ni-MOF.

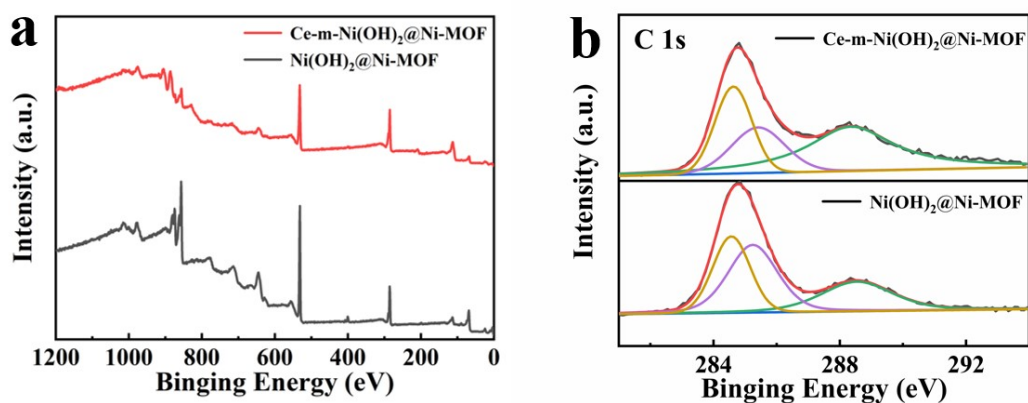

**Figure S3.** a) Full spectrum of Ce-m-Ni(OH)<sub>2</sub>@Ni-MOF and Ni(OH)<sub>2</sub>@Ni-MOF electrodes. b) High-resolution XPS spectra of C 1s for Ce-m-Ni(OH)<sub>2</sub>@Ni-MOF and Ni(OH)<sub>2</sub>@Ni-MOF.

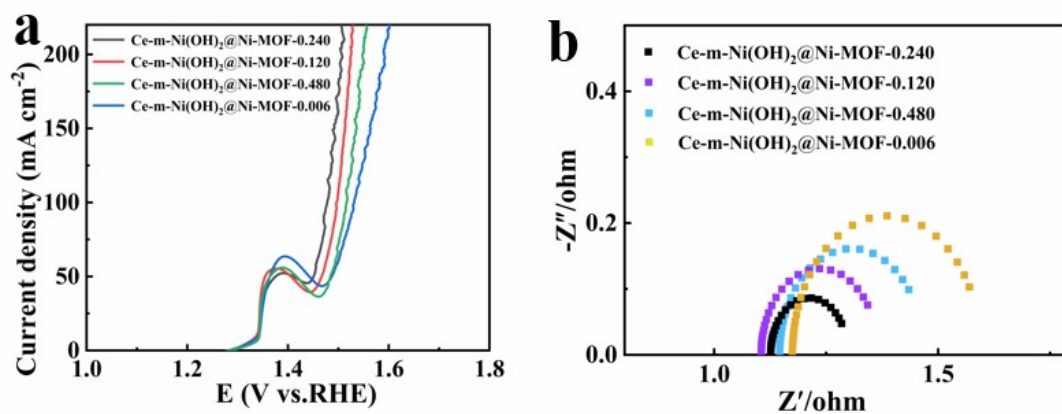

**Figure S4.** a) LSV polarization curves and b) electrochemical impedance spectroscopy (EIS) of Ce-m-Ni(OH)<sub>2</sub>@Ni-MOF-0.240, Ce-m-Ni(OH)<sub>2</sub>@Ni-MOF-0.120, Ce-m-Ni(OH)<sub>2</sub>@Ni-MOF-0.480 and Ce-m-Ni(OH)<sub>2</sub>@Ni-MOF-0.006.

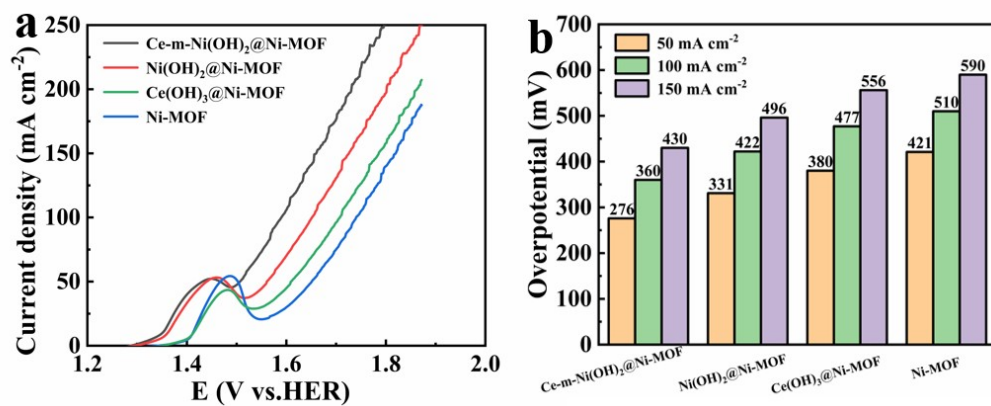

Figure S5. Polarization curves without IR compensation and overpotentials at 50, 100, and 150  $\text{mA cm}^{-2}$  for Ce-m-Ni(OH)<sub>2</sub>@Ni-MOF, Ni(OH)<sub>2</sub>@Ni-MOF, Ce(OH)<sub>3</sub>@Ni-MOF and Ni-MOF electrodes.

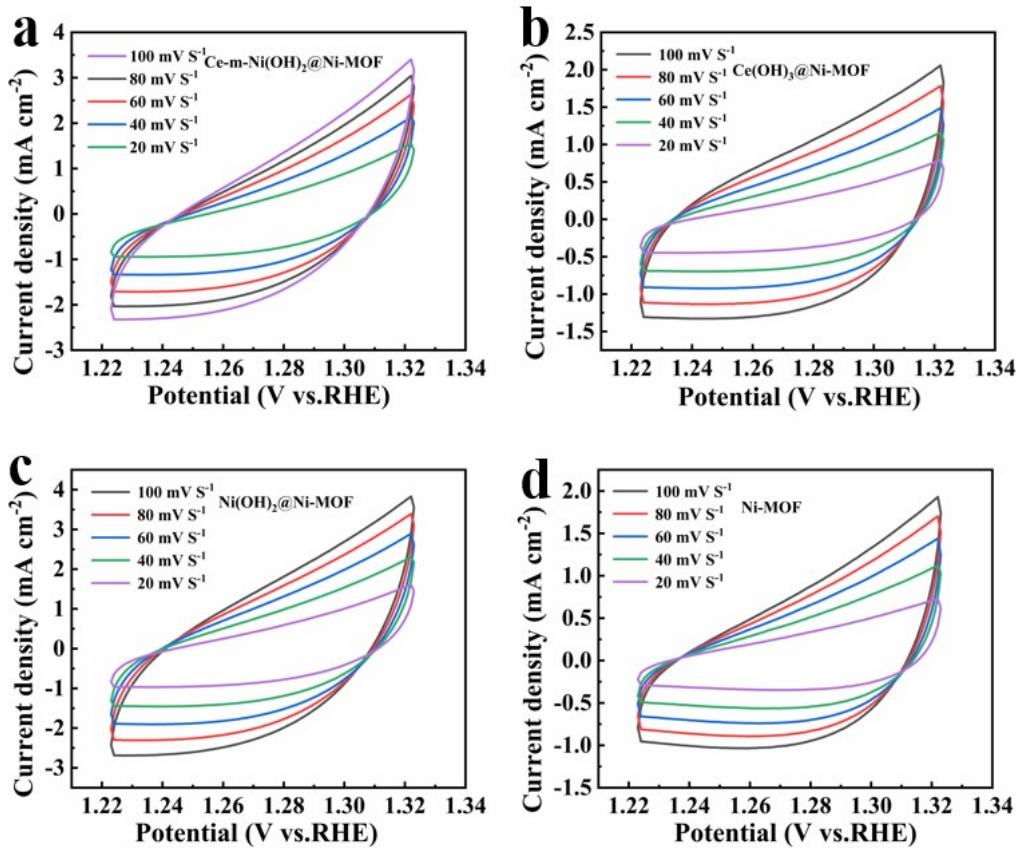

**Figure S6.** Cyclic voltammetry curves of a) Ce-m-Ni(OH)<sub>2</sub>@Ni-MOF, b) Ce(OH)<sub>3</sub>@Ni-MOF, c) Ni(OH)<sub>2</sub>@Ni-MOF, and d) Ni-MOF.

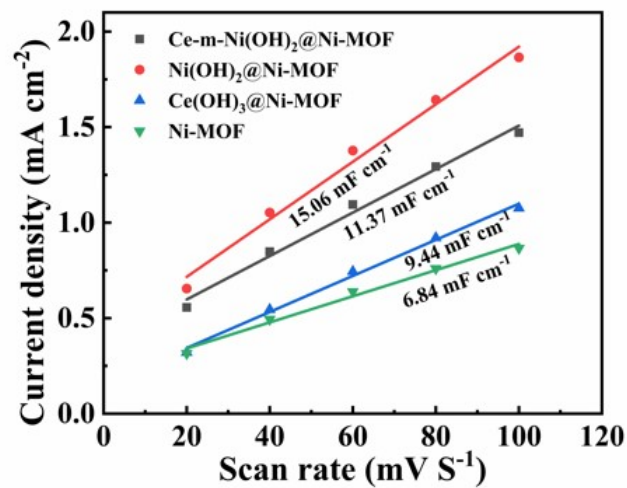

**Figure S7.**  $C_{dl}$  values of Ce-m-Ni(OH)<sub>2</sub>@Ni-MOF, Ni(OH)<sub>2</sub>@Ni-MOF, Ce(OH)<sub>3</sub>@Ni-MOF and Ni-MOF electrodes.

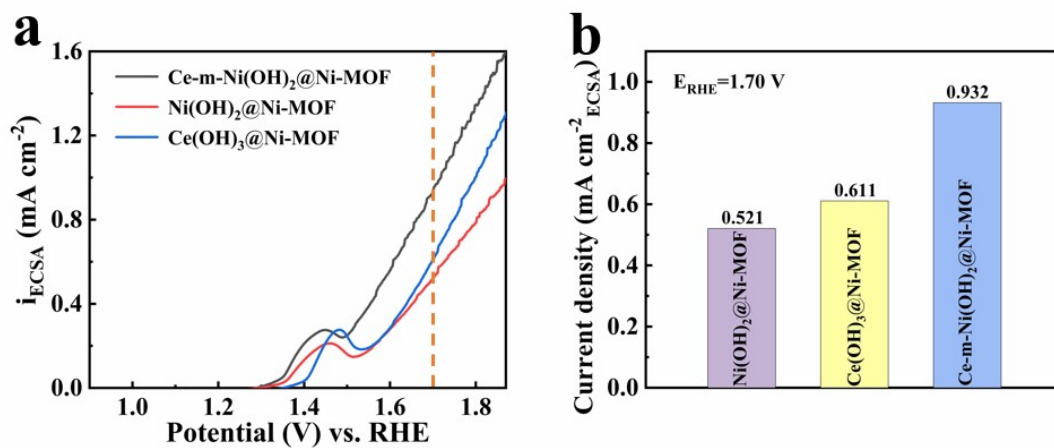

**Figure S8.** a) ECSA-normalized LSV curves, and b)  $i_{\text{ECSA}}$  ( $E_{\text{RHE}}=1.70$  V) of Ce-m-Ni(OH)<sub>2</sub>@Ni-MOF, Ce(OH)<sub>3</sub>@Ni-MOF and Ni(OH)<sub>2</sub>@Ni-MOF.

**Table S1** Comparisons of OER performance of Ce-m-Ni(OH)<sub>2</sub>@Ni-MOF with precious metal catalysts.

| Catalyst                                               | Electrolyte | Over potential (V) @<br>10 mA cm <sup>-2</sup> | Ref.      |
|--------------------------------------------------------|-------------|------------------------------------------------|-----------|
| Ce-m-Ni(OH) <sub>2</sub> @Ni-MOF                       | 1 M KOH     | 0.219 V at 50 mA cm <sup>-2</sup>              | This work |
| LNFBPO@Ni foam                                         | 1 M KOH     | 0.215                                          | [1]       |
| Ni(OH) <sub>2</sub> @Au                                | 0.1M KOH    | 0.390 V at 5 mA cm <sup>-2</sup>               | [2]       |
| NiCo/Fe <sub>3</sub> O <sub>4</sub> /MOF-74            | 1 M KOH     | 0.238                                          | [3]       |
| Fe-doped-(Ni-MOFs)/FeOOH                               | 1M KOH      | 0.210 V at 15 mA cm <sup>-2</sup>              | [4]       |
| Ni-MOF/LDH                                             | 1 M KOH     | 0.210                                          | [5]       |
| NiPc-NiFe <sub>0.09</sub>                              | 1 M KOH     | 0.300                                          | [6]       |
| NiCo-LDH@MOFs-4 h                                      | 1 M KOH     | 0.289                                          | [7]       |
| FeNi LDH/MOF                                           | 1 M KOH     | 0.272 V at 100 mA cm <sup>-2</sup>             | [8]       |
| Fe <sup>II</sup> <sub>0.1</sub> Ni <sub>0.4</sub> -MOF | 1 M KOH     | 0.294                                          | [9]       |
| N-Ni <sub>1</sub> Co <sub>4</sub> -S                   | 1 M KOH     | 0.284                                          | [10]      |
| FeNi (MoO <sub>4</sub> ) <sub>x</sub> @NF              | 1 M KOH     | 0.227                                          | [11]      |
| Ni <sub>0.95</sub> Mn <sub>0.05</sub> O/CNT            | 1 M KOH     | 0.293                                          | [12]      |
| Ni-Fe-Ce LDH                                           | 1 M KOH     | 0.242                                          | [13]      |
| Ce@NiFe LDH                                            | 1 M KOH     | 0.205                                          | [14]      |
| 6.7%Ce-NiFe<br>LDH@MoSe <sub>2</sub>                   | 1 M KOH     | 0.221                                          | [15]      |
| NiFeCe-LDH/MXene                                       | 1 M KOH     | 0.260                                          | [16]      |

**References:**

[1] Kwon J, Han H, Jo S, Choi S, Chung K Y, Ali G, Park K, Paik U, Song T. Amorphous Nickel-Iron Borophosphate for a Robust and Efficient Oxygen Evolution Reaction. *Adv. Energy Mater.* 2021, 11(25): 2100624.



- 
- [2] Mai H D, Kim S, Yoo H. Gold nanodots-decorated nickel hydroxide nanoflowers for enhanced electrochemical oxygen evolution activity. *J. Ind. Eng. Chem.* 2020, 82: 359-366.
- [3] Wang X, Xiao H, Li A, Li Z, Liu S, Zhang Q, Gong Y, Zheng L, Zhu Y, Chen C, Wang D, Peng Q, Gu L, Han X, Li J, Li Y. Constructing NiCo/Fe<sub>3</sub>O<sub>4</sub> heteroparticles within MOF-74 for efficient oxygen evolution reactions. *J. Am. Chem. Soc.* 2018, 140(45): 15336-15341.
- [4] Li C F, Xie L J, Zhao J W, Gu L F, Tang H B, Zheng L, Li G R. Interfacial Fe-O-Ni-O-Fe Bonding Regulates the Active Ni Sites of Ni-MOFs via Iron Doping and Decorating with FeOOH for Super-Efficient Oxygen Evolution. *Angew. Chem. Int. Ed.* 2022, 61(17): e202116934.
- [5] Zhang W D, Hu Q T, Wang L L, Gao J, Zhu H Y, Yan X, Gu Z G. In-situ generated Ni-MOF/LDH heterostructures with abundant phase interfaces for enhanced oxygen evolution reaction. *Appl. Catal. B: Environ.* 2021, 286: 119906.
- [6] Li J, Liu P, Mao J, Yan J, Song W. Structural and electronic modulation of conductive MOFs for efficient oxygen evolution reaction electrocatalysis. *J. Mater. Chem. A*, 2021, 9(18): 11248-11254.
- [7] Han M, Zhang X, Gao H, Chen S, Cheng P, Wang P, Zhao Z, Dang R, Wang G. In situ semi-sacrificial template-assisted growth of ultrathin metal-organic framework nanosheets for electrocatalytic oxygen evolution. *Chem. Eng. J.* 2021, 426: 131348.
- [8] Zheng F, Zhang W, Zhang X, Zhang Y, Chen W. Sub-2 nm Ultrathin and Robust 2D FeNi Layered Double Hydroxide Nanosheets Packed with 1D FeNi-MOFs for Enhanced Oxygen Evolution Electrocatalysis. *Adv. Funct. Mater.* 2021, 31(43): 2103318.
- [9] Zhang D, Huang R, Xie H, Li R, Liu X, Pan M, Lei Y. Effect of the valence state of initial iron source on oxygen evolution activity of Fe-doped Ni-MOF. *Chem. Papers*, 2020, 74(9): 2775-2784.
- [10] Zhong X, Wan H, Lin Y, Chen G, Wu D, Zheng Z, Liu X, Zhang Y. N-doped bimetallic sulfides hollow spheres derived from metal-organic frameworks toward cost-efficient and high performance oxygen evolution reaction. *Appl. Surf. Sci.* 2022, 591: 153173
- [11] Dastafkan K, Wang S, Rong C, Meyer Q, Li Y, Zhang Q, Zhao C. Cosynergistic Molybdate Oxo-Anionic Modification of FeNi-Based Electrocatalysts for Efficient Oxygen Evolution Reaction. *Adv. Funct. Mater.* 2022, 32(5): 2107342.

- 
- [12] Luo L, Huang H, Yang Y, Gong S, Li Y, Wang Y, Luo W, Li Z. Nickel and manganese oxide heterostructure nanoparticles supported by carbon nanotube for highly efficient oxygen evolution reaction catalysis. *Appl. Surf. Sci.* 2022, 575: 151699.
- [13] Xu H, Shan C, Wu X, Sun M, Huang B, Tang Y, Yan C H. Fabrication of layered double hydroxide microcapsules mediated by cerium doping in metal-organic frameworks for boosting water splitting. *Energy Environ. Sci.* 2020, 13(9): 2949-2956.
- [14] Liu M, Min K A, Han B, Lee L Y S. Interfacing or Doping? Role of Ce in Highly Promoted Water Oxidation of NiFe-Layered Double Hydroxide. *Adv. Energy Mater.* 2021, 11(33): 2101281.
- [15] Rong M, Mo Y, Cao Z, Ma X, Wang S, Zhong H. MoSe<sub>2</sub> regulates Ce-doped NiFe layered double hydroxide for efficient oxygen evolution reaction: The increase of active sites. *Int. J. Hydrog. Energy*, 2022, 47(43): 18688-18699.
- [16] Wen Y, Wei Z, Liu J, Li R, Wang P, Zhou B, Zhang X, Li J, Li Z. Synergistic cerium doping and MXene coupling in layered double hydroxides as efficient electrocatalysts for oxygen evolution. *J. Energy Chem.* 2021, 52: 412-420.
